# Supplementary material for: Unique catalysis of gold nanoparticles in the chemoselective hydrogenolysis with H2: cooperative effect between small gold nanoparticles and a basic support
Source: Royal Society of Chemistry journal article supplement (doi:10.1039/c2cc32850j), 2012-01-01
Supplement: c2cc32850j.pdf [file c2cc32850j.pdf]

## Supplementary Information

### Unique Catalysis of Gold Nanoparticles in the Chemoselective Hydrogenolysis with H<sub>2</sub>: Cooperative Effect between Small Gold Nanoparticles and a Basic Support

Akifumi Noujima,<sup>a</sup> Takato Mitsudome,<sup>a</sup> Tomoo Mizugaki,<sup>a</sup> Koichiro Jitsukawa,<sup>a</sup> and  
Kiyotomi Kaneda<sup>\*a, b</sup>

<sup>a</sup> Department of Materials Engineering Science, Graduate School of Engineering Science, Osaka  
University, 1-3 Machikaneyama, Toyonaka, Osaka, 560-8531, Japan.

E-mail: kaneda@cheng.es.osaka-u.ac.jp; Fax: +81 6-6850-6260; Tel: +81 6-6850-6260

<sup>b</sup> Research Center for Solar Energy Chemistry, Osaka University, 1-3 Machikaneyama, Toyonaka, Osaka,  
560-8531, Japan

## Experimental

### 1) General

All organic reagents were purified before use. Allylic carbonates were prepared by the reaction of the corresponding allylic alcohol with methyl chloroformate in the presence of pyridine.  $\text{HAuCl}_4 \cdot x\text{H}_2\text{O}$  was obtained from N. E. Chemcat. Co., Ltd.  $\text{MgO}$  (GR for analysis) was purchased from Merck Chemical Industries Co., Ltd.  $\text{Al}_2\text{O}_3$  (JRC-ALO-3),  $\text{SiO}_2$  (JRC-SIO-6) and  $\text{TiO}_2$  (JRC-TIO-4) were supplied by the Catalysis Society of Japan. GC-FID and GC-MS were performed on a Shimadzu GC-2014 instrument equipped with a KOCL-3000T column (3 m) and a Shimadzu GC-17A instrument equipped with a ULBON HR-1 capillary column (30 m  $\times$  0.25 mm  $\times$  0.25  $\mu\text{m}$ ), respectively. Inductively coupled plasma measurements were performed using a SII Nano Technology SPS7800 instrument.  $^1\text{H}$  and  $^{13}\text{C}$ -NMR spectra were recorded on a JEOL JNM-ESC400 spectrometer and a JNM-GSX270 spectrometer, respectively. Transmission electron microscopy (TEM) micrographs were obtained with a Hitachi HF-2000 microscope. Au L-edge X-ray absorption spectra were collected in the quick mode and recorded at room temperature in transmission mode at the facilities installed on the BL-01B1 line attached with a Si (311) monochromator at the SPring-8, Japan Atomic Energy Research Institute (JASRI), Harima, Japan. Data analysis was performed using the REX 2000 program, ver. 2.5.7 (Rigaku). Fourier transformation (FT) of the  $k^3$ -weighted extended X-ray absorption fine structure (EXAFS) data was performed to obtain the radial structural function.

## 2) General reaction procedures

A typical procedure for the hydrogenolysis of **1** using the Au/HT catalyst was as follows. Au/HT (0.10 g, 0.0045 mmol Au) was placed in a reaction vessel, followed by the addition of toluene (5 mL) and **1** (0.2 mmol). The reaction mixture was vigorously stirred at 80 °C under an H<sub>2</sub> balloon for 12 h. After the reaction, the Au/HT was removed by filtration, and naphthalene (0.2 mmol) was added as an internal standard. The obtained mixture was analyzed by GC and GC-MS.

## 3) Reuse experiments for the hydrogenolysis of **1**

After the hydrogenolysis of **1** under the above typical reaction conditions, Au/HT was separated by filtration and washed with toluene (3 x 10 mL). Next, additional portions of **1** (0.2 mmol) and toluene (5 mL) were added, followed by stirring under the identical conditions. The yields of **2** in the two reuse experiments were 90% and 88%, respectively.

## 4) Product identification

The products were identified by GC, GC-MS and NMR analyses. Retention times (GC or GC-MS) and chemical shifts (<sup>1</sup>H and <sup>13</sup>C-NMR) of the products were in agreement with those of authentic samples (commercially available).

## 5) Hydrogenolysis of **1** with 2-propanol

Au/HT (0.10 g) was placed in a reaction vessel, followed by the addition of toluene (5 mL), 2-propanol (0.6 mL) and **1** (0.2 mmol). The reaction mixture was vigorously stirred at 80 °C under Ar for 3 h. After the reaction, the Au/HT was removed by

centrifugation, and naphthalene (0.2 mmol) was added as an internal standard. The yields of **2** and **3** were 89% and 10%, respectively.

#### **6) Hydrogenolysis of 1 with CO/H<sub>2</sub>O**

Au/HT (0.10 g), THF (5 mL), water (0.1 mL) and **1** (0.2 mmol) were placed in an autoclave tube, and the mixture was vigorously stirred at 100 °C for 3 h under a 5 atm CO atmosphere. After the reaction, the Au/HT was removed by centrifugation, and naphthalene (0.2 mmol) was added as an internal standard. The yields of **2** and **3** were 88 % and 10%, respectively.

## EXAFS analysis

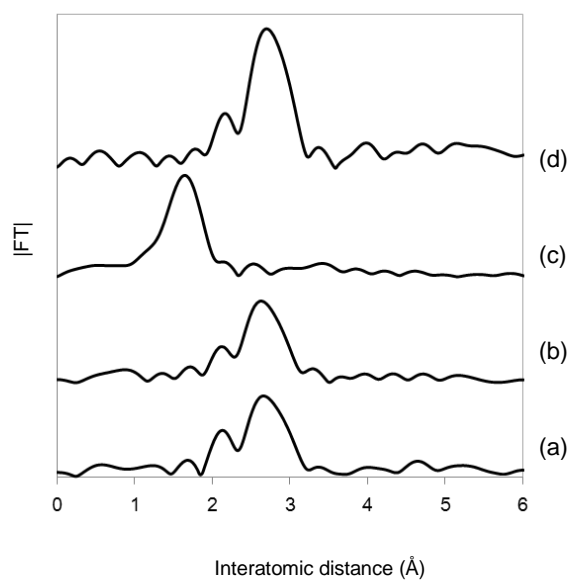

Curve fitting analysis of Au L-edge EXAFS

|                               | Coord. no. (CN) | Interatomic dis. (Å) | $\Delta\sigma/\text{\AA}^2$ |
|-------------------------------|-----------------|----------------------|-----------------------------|
| Au/HT (fresh)                 | 8.6             | 2.82                 | 0.028                       |
| Au/HT (after two times reuse) | 8.9             | 2.83                 | 0.020                       |
| Au foil                       | 12              | -                    | -                           |

Figure 1S. Fourier transformed  $k^3$ -weighted Au L-edge EXAFS for (a) Au/HT, (b) Au/HT after being reused twice, (c) Au<sub>2</sub>O<sub>3</sub> and (d) Au foil.

## TEM analysis

(a) Au/HT (fresh)

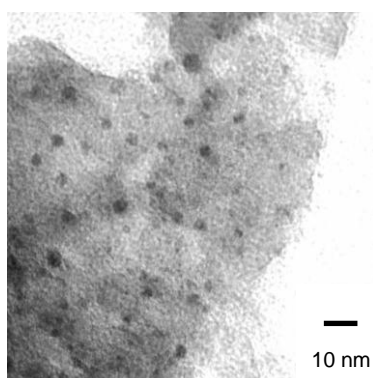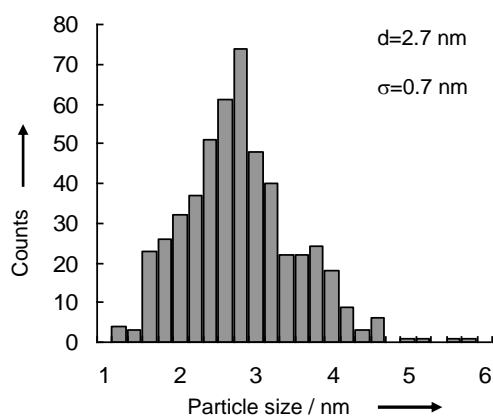

(b) Au/HT (after reuse experiment)

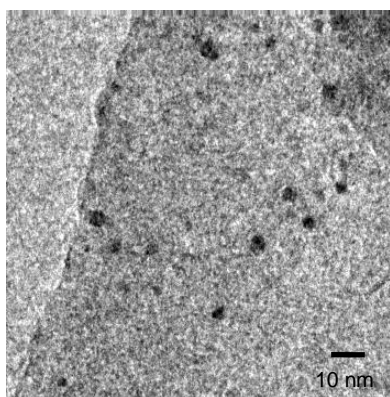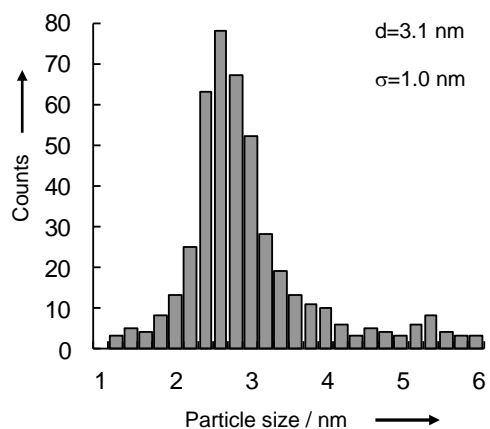

Figure 2S. Typical TEM images and size distribution diagrams (obtained by counting at least 500 particles) of (a) fresh Au/HT and (b) Au/HT after reuse.

## Leaching Test

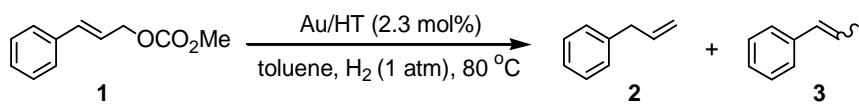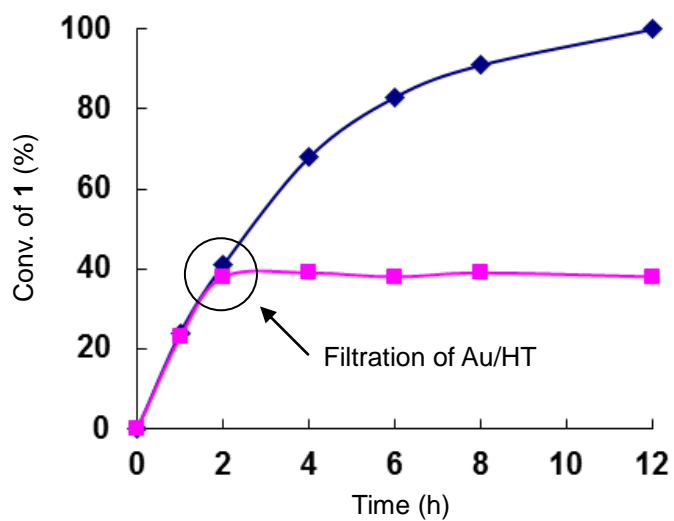

Figure 3S. Time profile for hydrogenolysis of **1** using Au/HT

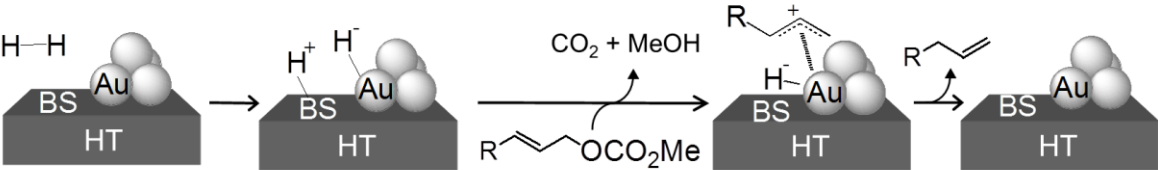

Figure 4S. Plausible reaction pathway
